# Supplementary material for: Fungal Endophytic Community and Diversity Associated with Desert Shrubs Driven by Plant Identity and Organ Differentiation in Extremely Arid Desert Ecosystem
Source: MDPI journal article supplement (doi:10.3390/jof7070578), 2021-07-20
Supplement: s1 [file s1]

**Table S2** Structural attributes of networks obtained through network analysis for different plant niches (stem, leaf and root) and the total networks.

|                            | Stem  | Leaf  | Root   | Total |
|----------------------------|-------|-------|--------|-------|
| Nodes                      | 81    | 79    | 120    | 112   |
| Edges                      | 318   | 308   | 1385   | 441   |
| Network diameter           | 8     | 7     | 7      | 11    |
| Network connectivity       | 7.852 | 7.797 | 23.083 | 7.875 |
| Clustering coefficient     | 0.450 | 0.627 | 0.595  | 0.525 |
| Network density            | 0.098 | 0.100 | 0.194  | 0.071 |
| Network centralization     | 0.181 | 0.134 | 0.247  | 0.139 |
| Characteristic path length | 3.101 | 3.453 | 2.357  | 3.913 |
| Network heterogeneity      | 0.680 | 0.603 | 0.621  | 0.852 |
| Co-presence (%)            | 91.5% | 97.1% | 98.9%  | 100%  |

**Table S3** The ten keystone species in each plant niches, characterized by their number of total degrees, as either positive (+) or negative (-), and their relative abundance (%).

|       | Order                          | Genus                    | Species                                | OTU    | degree | +  | - | Abundance (%) |
|-------|--------------------------------|--------------------------|----------------------------------------|--------|--------|----|---|---------------|
| Stem  | <i>Pleosporales</i>            | <i>Neocamarosporium</i>  | <i>Neocamarosporium</i> sp.            | OTU150 | 22     | 21 | 1 | 1.1735        |
|       | <i>Pleosporales</i>            | unclassified             | unclassified <i>Pleosporales</i>       | OTU175 | 19     | 19 | 0 | 2.9137        |
|       | <i>Cystofilobasidiales</i>     | <i>Udeniomyces</i>       | unclassified <i>Udeniomyces</i>        | OTU188 | 19     | 17 | 2 | 2.9507        |
|       | <i>Filobasidiales</i>          | <i>Filobasidium</i>      | unclassified <i>Filobasidium</i>       | OTU174 | 18     | 16 | 2 | 0.6769        |
|       | <i>Cystofilobasidiales</i>     | <i>Udeniomyces</i>       | <i>Udeniomyces puniceus</i>            | OTU185 | 18     | 15 | 3 | 0.9139        |
|       | <i>Pleosporales</i>            | <i>Hazslinszkyomyces</i> | <i>Hazslinszkyomyces lycii</i>         | OTU398 | 17     | 17 | 0 | 0.2811        |
|       | Unclassified <i>Ascomycota</i> | unclassified             | unclassified <i>Ascomycota</i>         | OTU480 | 17     | 17 | 0 | 0.3411        |
|       | Unclassified <i>Ascomycota</i> | unclassified             | unclassified <i>Ascomycota</i>         | OTU212 | 17     | 17 | 0 | 0.3945        |
|       | Unclassified <i>Ascomycota</i> | unclassified             | unclassified <i>Ascomycota</i>         | OTU473 | 17     | 17 | 0 | 0.0959        |
|       | <i>Tremellales</i>             | unclassified             | unclassified <i>Sirobasidiaceae</i>    | OTU173 | 16     | 16 | 0 | 0.1922        |
| Leaf  | <i>Pleosporales</i>            | unclassified             | unclassified <i>Phaeosphaeriaceae</i>  | OTU178 | 18     | 18 | 0 | 0.0005        |
|       | <i>Dothideales</i>             | <i>Dothiora</i>          | <i>Dothiora</i> sp.                    | OTU9   | 18     | 18 | 0 | 1.6539        |
|       | <i>Sordariales</i>             | <i>Podospira</i>         | <i>Podospira setosa</i>                | OTU368 | 18     | 18 | 0 | 0.0805        |
|       | <i>Hypocreales</i>             | <i>Acremonium</i>        | <i>Acremonium chrysogenum</i>          | OTU167 | 18     | 18 | 0 | 3.2312        |
|       | <i>Pezizales</i>               | <i>Lasiobolidium</i>     | <i>Lasiobolidium spirale</i>           | OTU446 | 18     | 18 | 0 | 0.0098        |
|       | <i>Pezizales</i>               | unclassified             | unclassified <i>Ascobolaceae</i>       | OTU154 | 18     | 18 | 0 | 0.0031        |
|       | <i>Tremellales</i>             | <i>Dioszegia</i>         | unclassified <i>Dioszegia</i>          | OTU170 | 18     | 18 | 0 | 0.0003        |
|       | <i>Pleosporales</i>            | unclassified             | unclassified <i>Didymosphaeriaceae</i> | OTU498 | 18     | 18 | 0 | 0.0015        |
|       | <i>Pleosporales</i>            | <i>Alternaria</i>        | <i>Alternaria chlamydospora</i>        | OTU483 | 15     | 15 | 0 | 0.0736        |
|       | <i>Pleosporales</i>            | unclassified             | unclassified <i>Lentitheciaceae</i>    | OTU493 | 15     | 15 | 0 | 0.1088        |
|       | <i>Filobasidiales</i>          | <i>Naganishia</i>        | unclassified <i>Naganishia</i>         | OTU189 | 52     | 52 | 0 | 0.0921        |
|       | <i>Pleosporales</i>            | <i>Thyrostroma</i>       | <i>Thyrostroma</i> sp.                 | OTU10  | 51     | 51 | 0 | 0.8366        |
| Root  | <i>Dothideales</i>             | <i>Dothiora</i>          | <i>Dothiora</i> sp.                    | OTU9   | 49     | 49 | 0 | 0.0270        |
|       | <i>Pleosporales</i>            | unclassified             | unclassified <i>Pleosporales</i>       | OTU337 | 47     | 45 | 2 | 3.7803        |
|       | <i>Pleosporales</i>            | <i>Neocamarosporium</i>  | <i>Neocamarosporium</i> sp.            | OTU5   | 46     | 46 | 0 | 0.0092        |
|       | <i>Pleosporales</i>            | <i>Thyrostroma</i>       | unclassified <i>Thyrostroma</i>        | OTU11  | 46     | 46 | 0 | 0.0182        |
|       | <i>Pleosporales</i>            | unclassified             | <i>Pleosporales</i> sp.                | OTU120 | 45     | 45 | 0 | 0.0003        |
|       | <i>Pleosporales</i>            | <i>Neocamarosporium</i>  | <i>Neocamarosporium</i> sp.            | OTU227 | 45     | 45 | 0 | 0.0283        |
|       | <i>Pleosporales</i>            | <i>Sporormiella</i>      | <i>Sporormiella australis</i>          | OTU218 | 45     | 45 | 0 | 0.0085        |
|       | <i>Pleosporales</i>            | unclassified             | unclassified <i>Pleosporales</i>       | OTU203 | 43     | 43 | 0 | 0.0196        |
|       | <i>Hypocreales</i>             | <i>Gibberella</i>        | <i>Gibberella tricineta</i>            | OTU89  | 23     | 23 | 0 | 0.0511        |
|       | <i>Hypocreales</i>             | <i>Bionectria</i>        | <i>Bionectria pseudochroleuca</i>      | OTU80  | 23     | 23 | 0 | 0.0383        |
| Total | <i>Hypocreales</i>             | <i>Lecanicillium</i>     | unclassified <i>Lecanicillium</i>      | OTU53  | 23     | 23 | 0 | 0.1486        |
|       | <i>Hypocreales</i>             | <i>Sarocladium</i>       | <i>Sarocladium kiliense</i>            | OTU417 | 23     | 23 | 0 | 0.2487        |
|       | <i>Chaetothyriales</i>         | <i>Cyphellophora</i>     | <i>Cyphellophora olivacea</i>          | OTU103 | 23     | 23 | 0 | 0.1003        |
|       | <i>Hypocreales</i>             | <i>Sarocladium</i>       | unclassified <i>Sarocladium</i>        | OTU45  | 23     | 23 | 0 | 0.0507        |
|       | <i>Eurotiales</i>              | <i>Penicillium</i>       | <i>Penicillium sanguifluum</i>         | OTU96  | 23     | 23 | 0 | 0.1993        |
|       | <i>Hypocreales</i>             | <i>Gibberella</i>        | <i>Gibberella tricineta</i>            | OTU26  | 23     | 23 | 0 | 0.0464        |
|       | <i>Hypocreales</i>             | <i>Fusarium</i>          | <i>Fusarium proliferatum</i>           | OTU400 | 22     | 22 | 0 | 0.8044        |
|       | <i>Hypocreales</i>             | <i>Fusarium</i>          | <i>Fusarium redolens</i>               | OTU477 | 22     | 22 | 0 | 0.2570        |
