# Supplementary figures and images for: Fungal Endophytic Community and Diversity Associated with Desert Shrubs Driven by Plant Identity and Organ Differentiation in Extremely Arid Desert Ecosystem
Source: MDPI journal article supplement (doi:10.3390/jof7070578), 2021-07-20

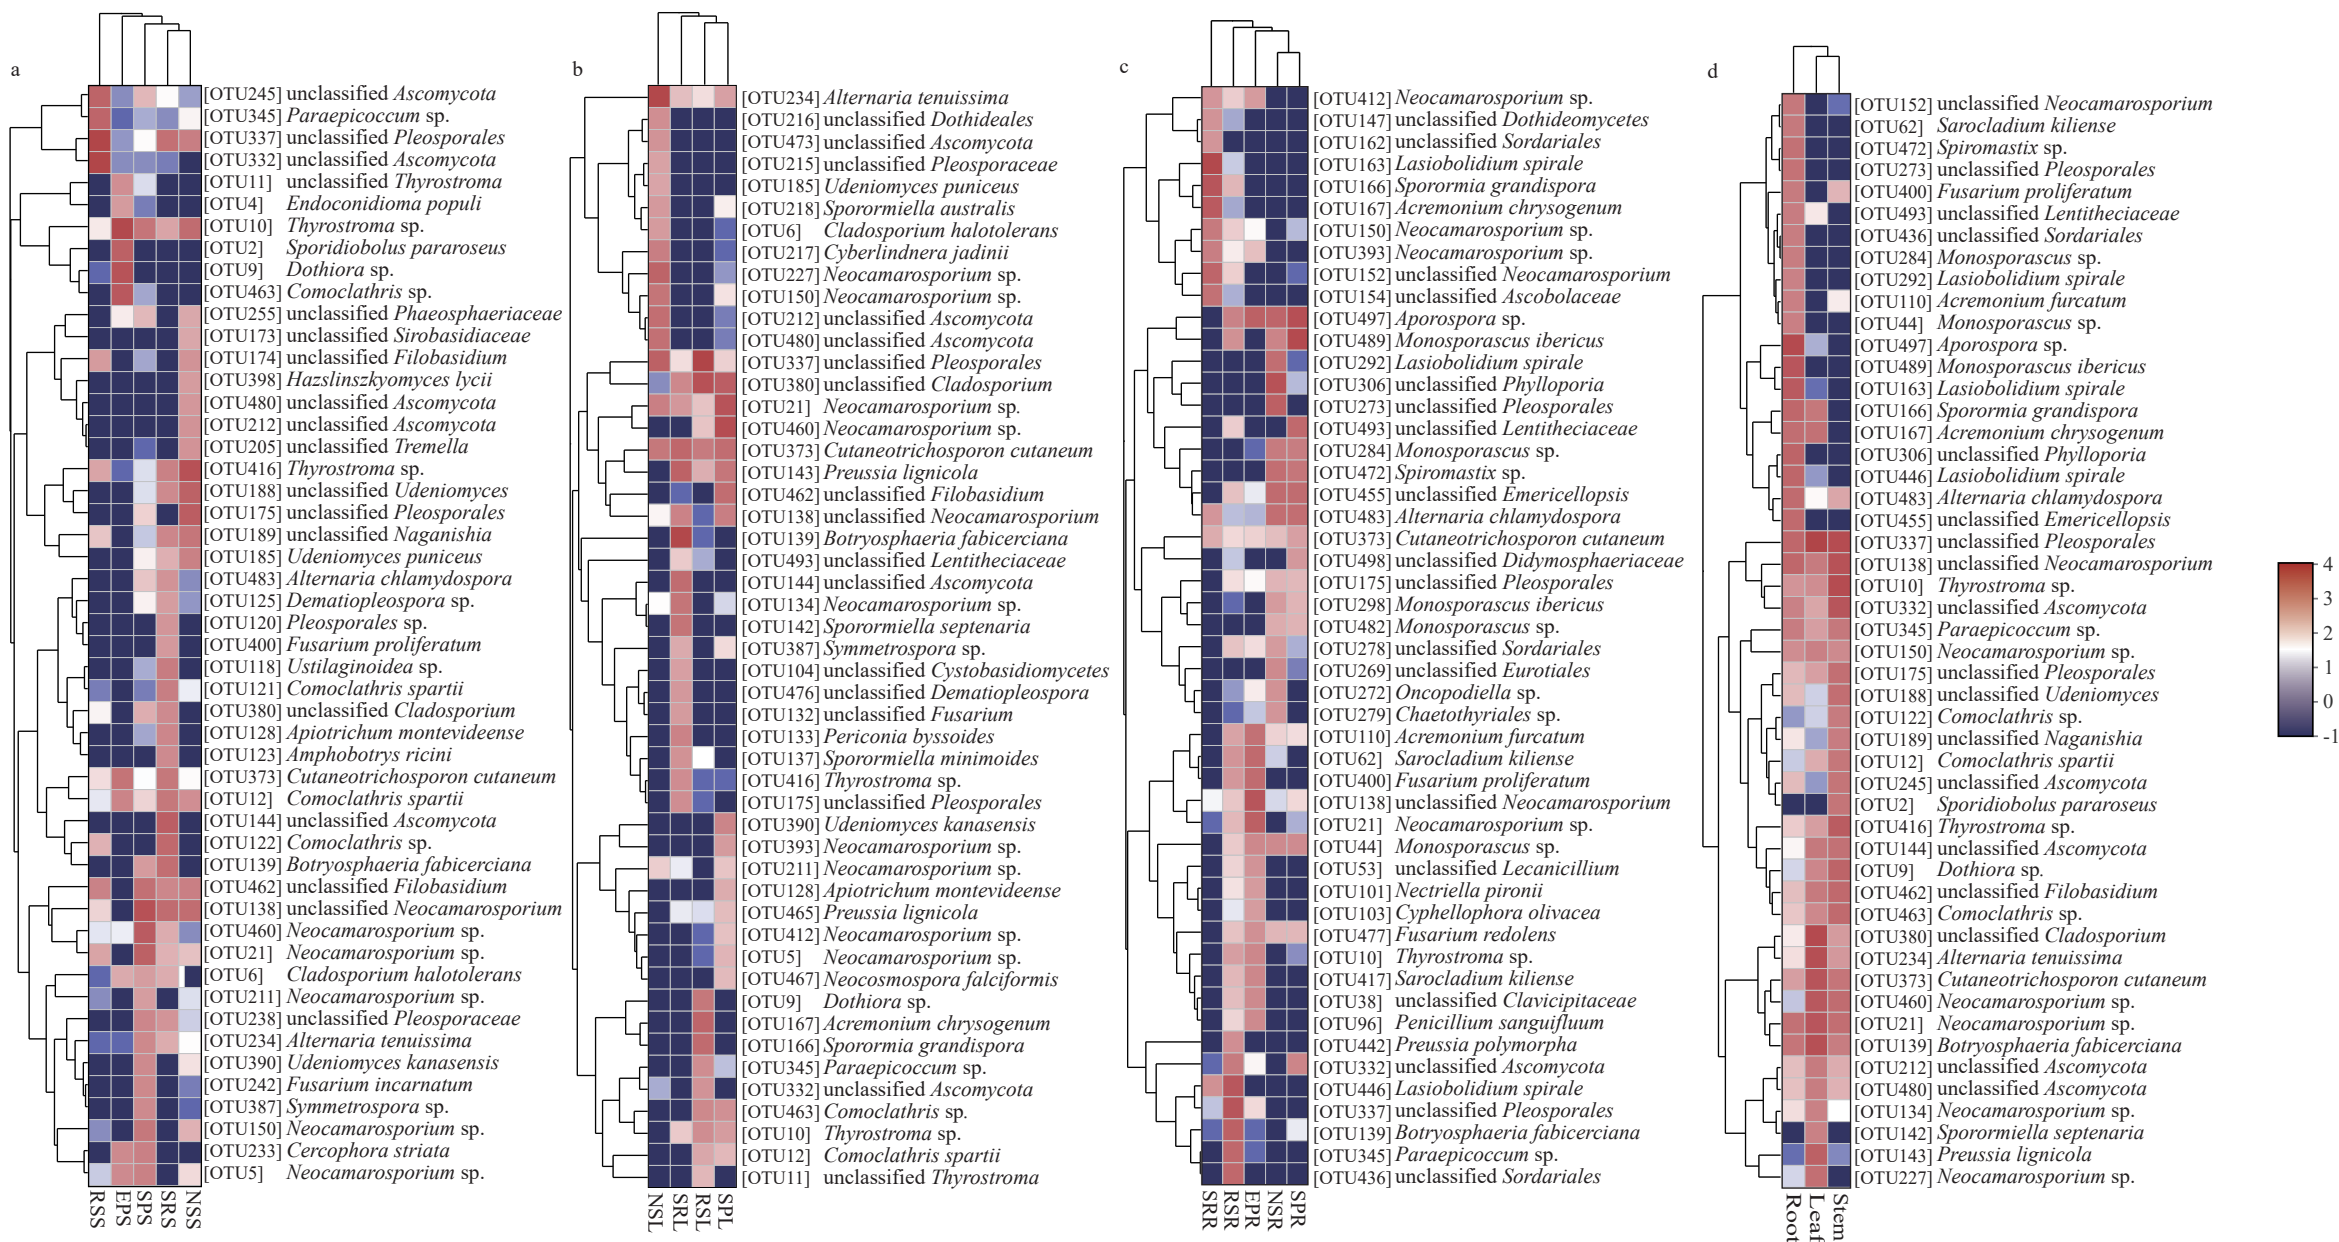

Figure S3

Supplement: s1 [file s1]

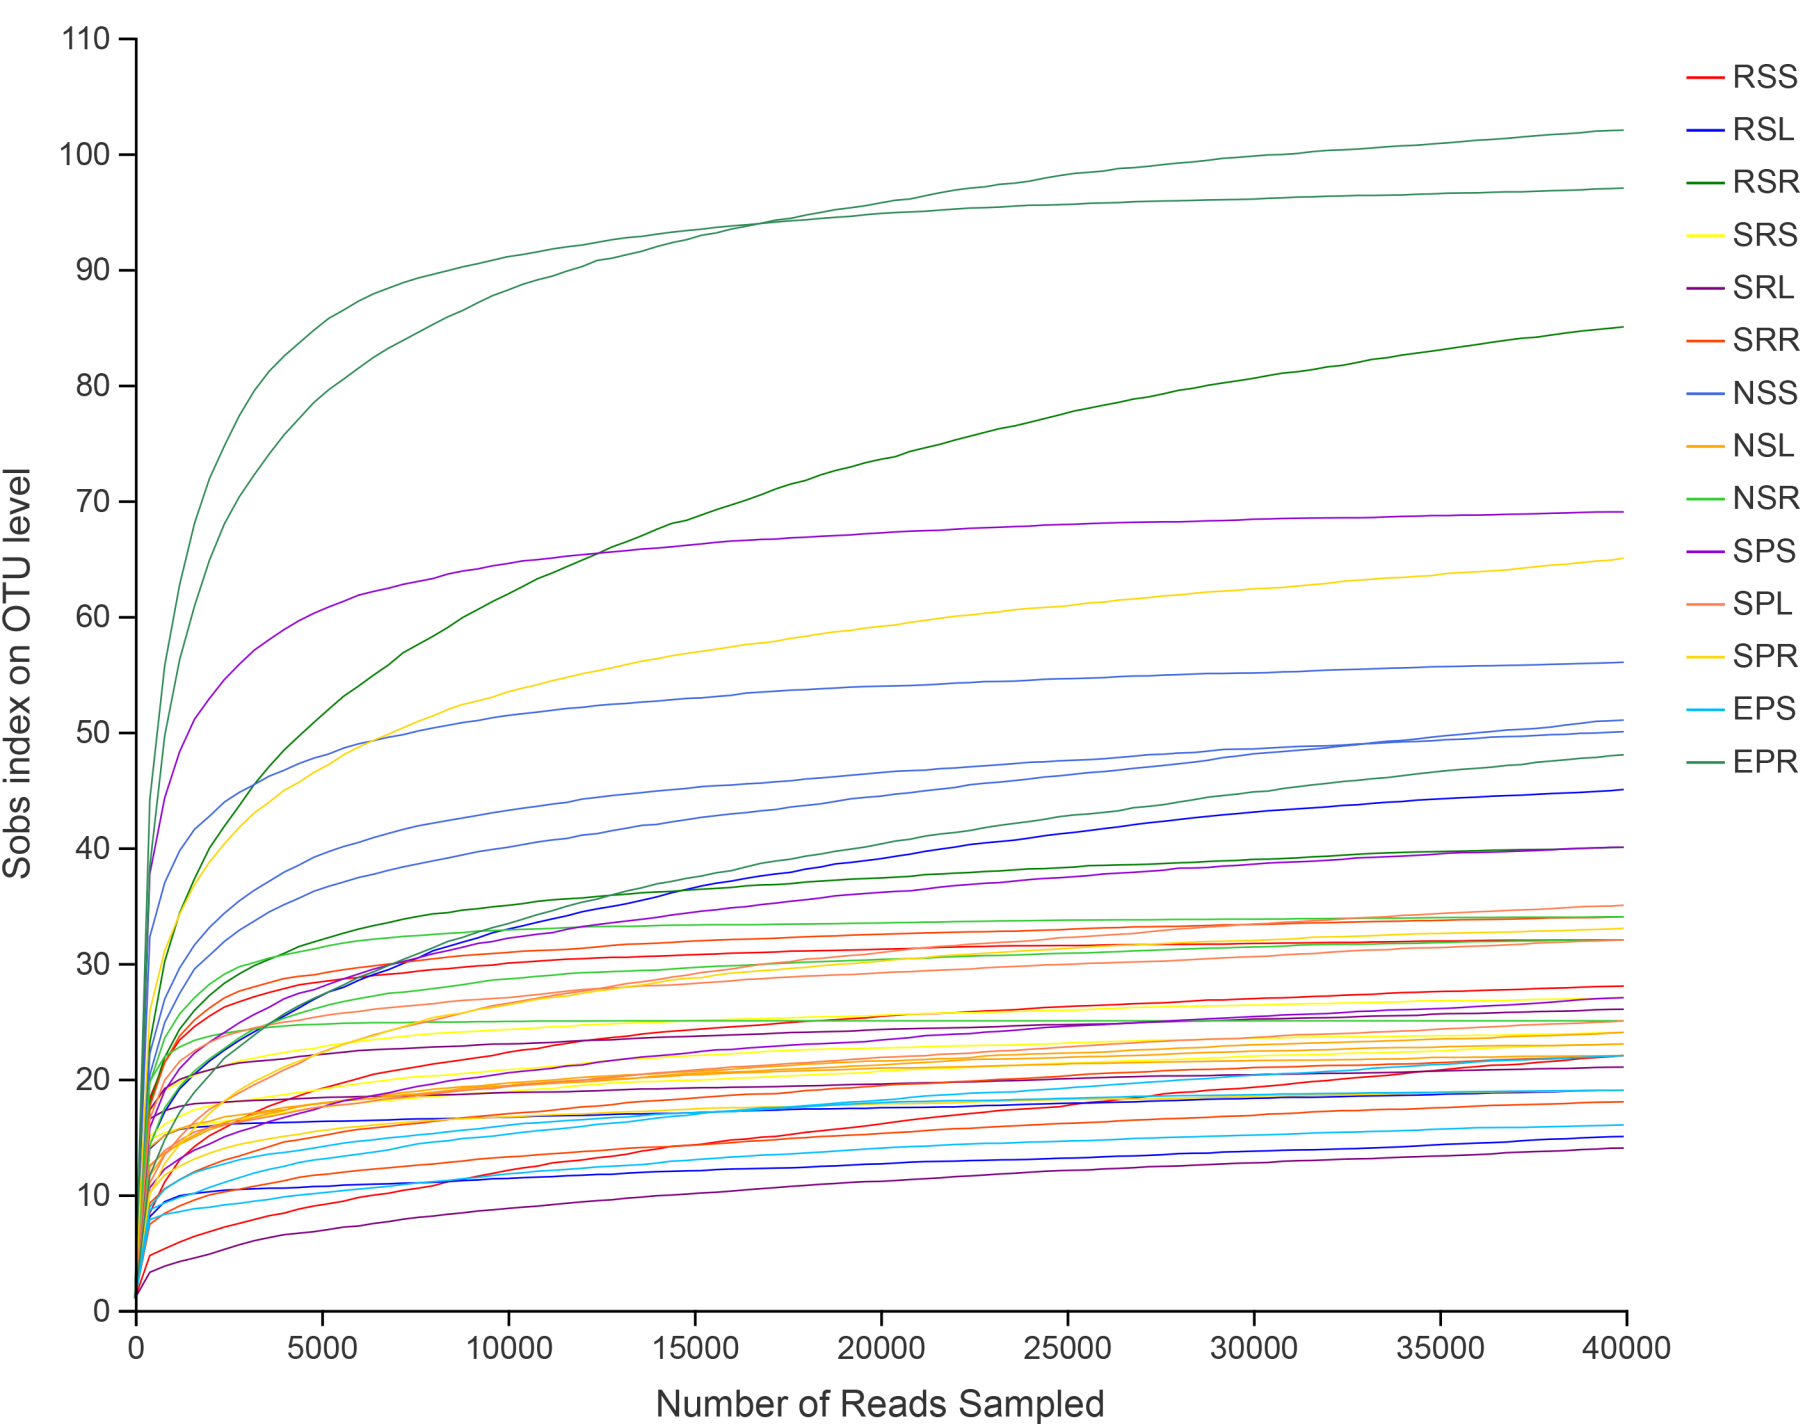

Figure S1

Supplement: s1 [file s1]

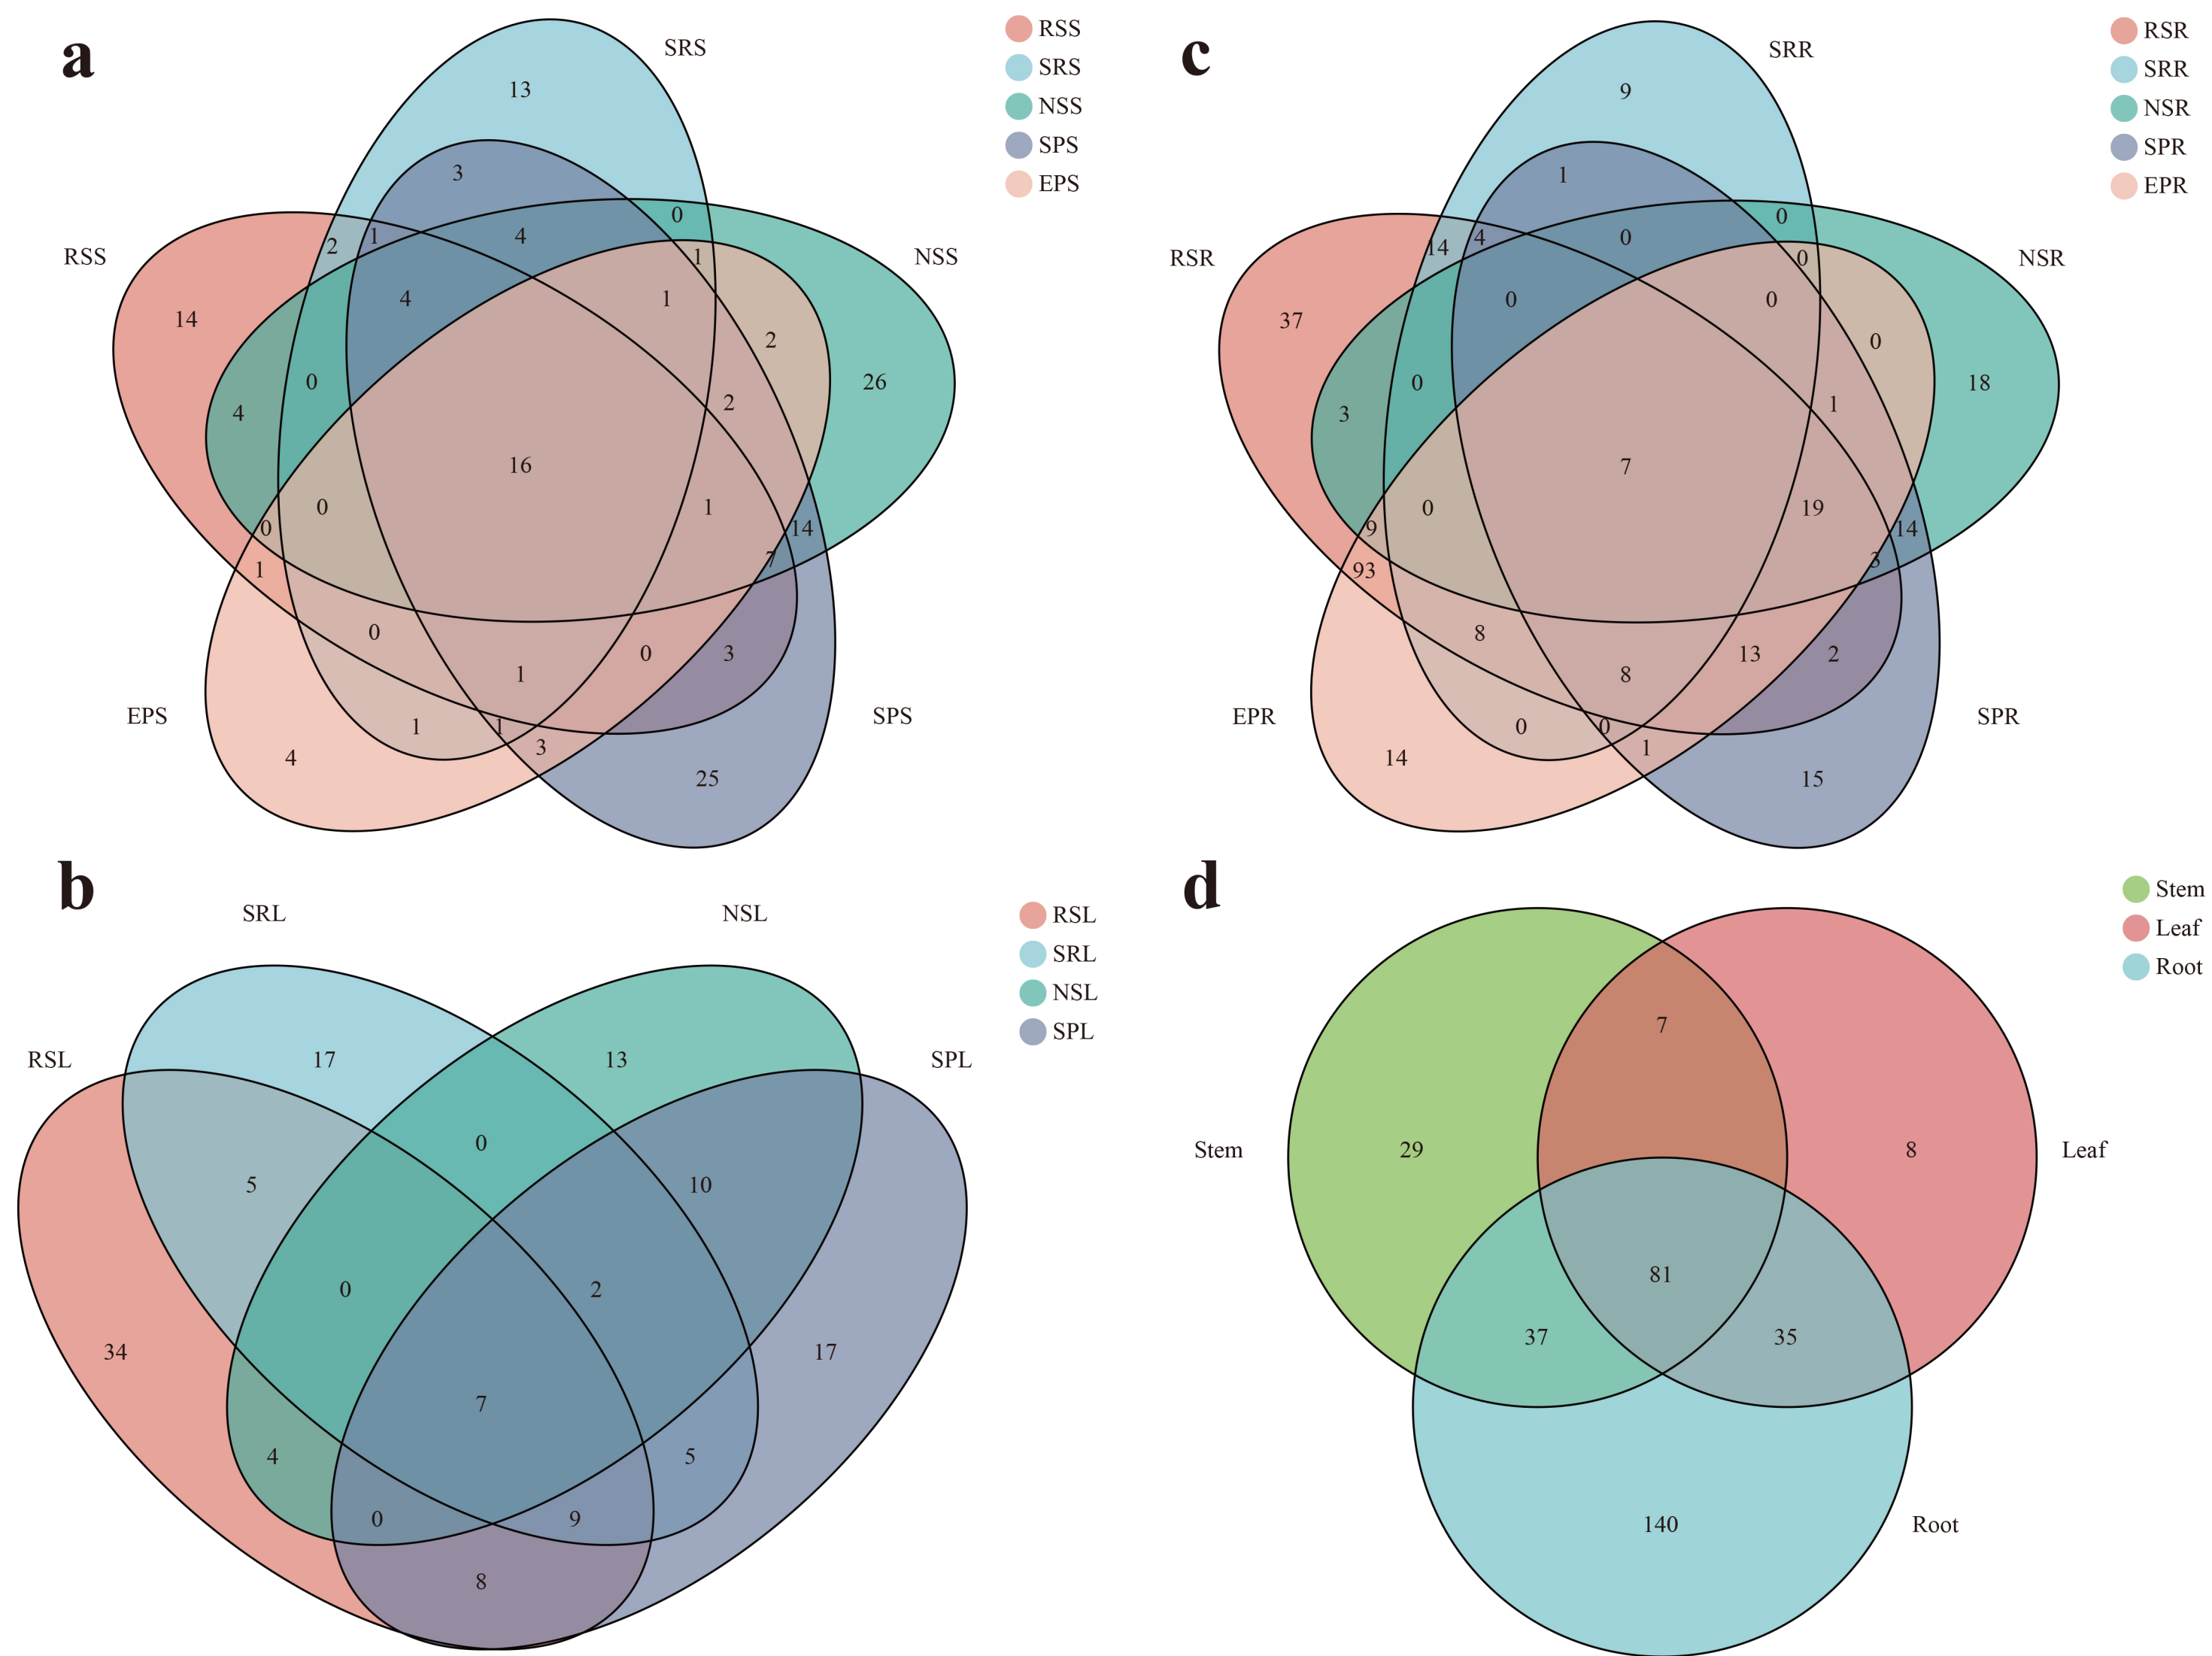

Figure S2

Supplement: s1 [file s1]
